# Supplementary material
Source: Elsevier journal article supplement (https://www.sciencedirect.com/science/article/pii/S1575181318302110)
Supplement: mmc1 [file S1575181318302110:mmc1.pdf]

## SUPPLEMENTARY MATERIAL

### APPENDIX 1. CASES FOR SIMULATION-BASED ACTIVITY

---

#### OBSERVATIONAL RESEARCH CASES

---

- Consent to communicate the case of an infant with a rare congenital disease
  - Consent to participate in a prostate screening test
  - Consent to participate providing clinical information on an analytic observational study regarding environmental exposure to pollutants
  - Consent regarding information for a verbal autopsy in the case of maternal death
  - To participate in a prospective study regarding the food environment at home and a child weight status
  - To report the clinical case of a patient with a rare tumor who underwent a successful treatment
  - To report the outcome of an elderly patient with blindness due to retinopathy
  - To include a patient's medical records for a case series regarding an emerging viral disease associated with an ongoing outbreak
  - To participate in a breast screening test for research purposes
  - To participate in a sexually transmitted diseases study of seroprevalence
  - To provide clinical records and an interview on sexual dysfunction after incomplete spinal stroke
  - To use photographs and images of rare cutaneous lesions as image-based clinical case reports and educational purposes
- 

#### ADDITIONAL CONSIDERATIONS ADDED:

- The patient is a minor
- The patient's parents are under a dispute for custody
- Elder patient with dementia
- Patient who only understands indigenous dialect
- Patients from underserved remote communities
- Minor does not want to participate even when parents do
- Patient from specific religious groups
- Patient fearing for the spouse opinion

## EXPERIMENTAL RESEARCH CASES

- 
- To enroll in a study of a new administration vehicle of insulin (nasal spray)
- 
- To receive a knee prosthesis elaborated with plastic materials under experimentation
- 
- To enroll in an experimental pharmacologic treatment for cancer that generates hormonal dysfunction
- 
- To enroll in an experimental rehabilitation program after amputation of a toe in a diabetic patient
- 
- To participate in a clinical trial regarding a new technique of bariatric surgery
- 
- To enroll in a five-year cohort study of urinary tract infections in patients with congenital renal malformations
- 
- To participate in a drug trial regarding a pharmacologic alternative to reception of blood transfusions in patients who are programmed for hysterectomy
- 
- To accept a new scheme of experimental hyperbaric oxygen therapy in a patient who refuses fasciotomy to treat compartmental syndrome in lower limb
- 
- Experimental plasmapheresis procedure in a patient with pancreatitis
- 
- For a Parkinson's disease experimental surgery
- 
- For an experimental intervention with aromatherapy during trans-surgical period
- 
- To participate providing a new unpatented formula for infants and toddlers
- 

### CONSIDERATIONS ADDED:

- The patient has a terminal disease
- The patient's parents are under a dispute for custody
- Elder patient with dementia
- Patient who only understands indigenous dialect
- Patients from underserved remote communities
- Minor does not want to participate even when parents do
- Patient from specific religious groups
- Patient already on a clinical trial

**APPENDIX 2**

Student Name:

Class and generation:

Evaluator:

| <b>EVALUATION CHECKLIST FOR SIMULATION-BASED INFORMED CONSENT FOR HEALTH RESEARCH WITH HUMAN SUBJECTS.</b> |                                                                                                       | <b>SI</b> | <b>NO</b> | <b>N/A</b> |
|------------------------------------------------------------------------------------------------------------|-------------------------------------------------------------------------------------------------------|-----------|-----------|------------|
| 1                                                                                                          | Introduces him/herself providing his name, position and institution                                   |           |           |            |
| 2                                                                                                          | Adequately Identifies the individual who is in conditions to be informed and consent                  |           |           |            |
| 3                                                                                                          | Informs on the nature of the study (experimental/observational) for which s/he asks for consent       |           |           |            |
| 4                                                                                                          | Informs about the main objective of the study                                                         |           |           |            |
| 5                                                                                                          | Clearly explains the scientific and social benefits that will derive from the research                |           |           |            |
| 6                                                                                                          | Informs on the risks associated with the patient's participation (social, psychological and physical) |           |           |            |
| 7                                                                                                          | Provides information of the alternatives to the patient's participation                               |           |           |            |
| 8                                                                                                          | Ensures the voluntary nature of his participation                                                     |           |           |            |
| 9                                                                                                          | Provides contact information and how to obtain additional data                                        |           |           |            |
| 10                                                                                                         | Advises on what to do if the patient change his/her mind to withdraw                                  |           |           |            |
| 11                                                                                                         | Provides specific information on how the identity and personal information Will be protected          |           |           |            |
| 12                                                                                                         | Specifies if the information will be used for other researches, educational or publication purposes   |           |           |            |
| 13                                                                                                         | Does not offer inadequate or unreal remuneration                                                      |           |           |            |
| 14                                                                                                         | Informs of the main expected outcomes after treatment (when applicable)                               |           |           |            |
| 15                                                                                                         | Uses adequate terminology, explaining any technical terms clearly                                     |           |           |            |
| 16                                                                                                         | Does not exaggerate the benefits or minimize the risks                                                |           |           |            |
| 17                                                                                                         | Asks for a translator in case of a foreign language patient                                           |           |           |            |
| 18                                                                                                         | Asks for assent from the patient if minor (when applicable)                                           |           |           |            |
| 19                                                                                                         | Clarifies the difference between regular medical attention and research projects                      |           |           |            |
| 20                                                                                                         | If applicable, invites witnesses and provides a copy of the informed consent                          |           |           |            |
| 21                                                                                                         | Opens the opportunity for a two-way dialog                                                            |           |           |            |
| 22                                                                                                         | Answers to the questions and doubts posed by the patient or his/her family                            |           |           |            |

Does not apply (N/A)

ANNOTATIONS

|  |
|--|
|  |
|--|
